# MIND TO MIND

*Creative writing that explores the abstract side  
of our profession and our lives*

*Stephen T. Harvey, M.D., Editor*

## Labrys

Nancy Nowak

I  
In the west  
a sallow full moon, the color of distressed  
metal, has stalled as though  
I ever could be righted by  
its tidal pull  
while the rising sun  
refuses to burn  
away the tule fog  
as my love and I drive the highway north.  
No matter  
how various we've found  
this small city, this morning  
we take the only route possible  
to the heart, to  
the one way I can be  
rid of something  
monstrous, and mine  
a single thread tied  
to him my home  
who will wait  
as I am led back  
to my body, altered.

---

This poem is one of the finalists of Anesthesiology's first annual creative writing competition, The Letheon.

shenancydoah@yahoo.com

Permission to reprint granted to the American Society of Anesthesiologists, Inc., and Wolters Kluwer Health, Inc., by copyright author/owner.  
Anesthesiology 2018; 129:608
